# Supplementary material
Source: Springer Nature journal article supplement (https://www.springermedizin.de/resource/supplementary/13053_2009_142_MOESM2_ESM.pdf/9674284)

**MLH1 mutation**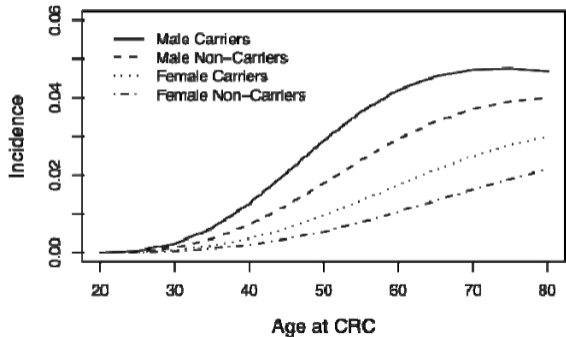**MSH2 mutation**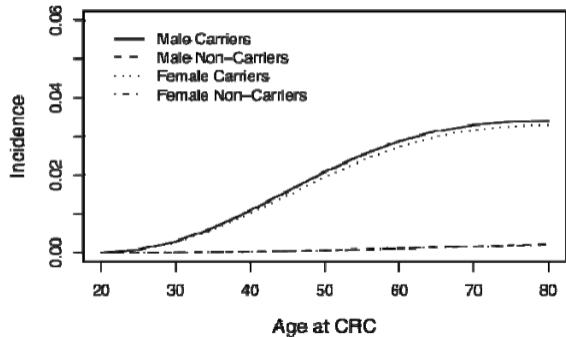

Supplement: MOESM2 [file 9674284]
